# Supplementary material for: How Climate Change Impacts the Distribution of Lithocarpus hancei (Fagaceae), a Dominant Tree in East Asian Montane Cloud Forests
Source: MDPI journal article supplement (doi:10.3390/f14051049), 2023-05-18
Supplement: s1 [file s1]

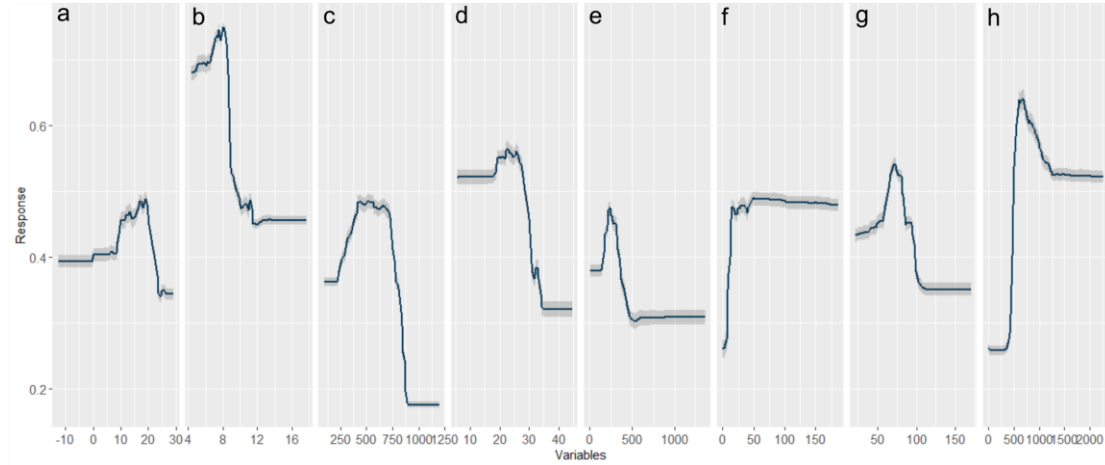

**Figure S1.** Response curves of the eight selected climatic variables that used in SDMs for *L. hancei*. AMT: the Annual Mean Temperature (a); MDR: the Mean Diurnal Range (b); TS: the Temperature Seasonality (c); MTWM: the Max Temperature of Warmest Month (d); PrecWM: the Precipitation of Wettest Month (e); PrecDM: the Precipitation of Driest Month (f); PS: the Precipitation Seasonality (g); PrecWQ: the Precipitation of Warmest Quarter (h).
